# Supplementary material for: Sulfur and nitrogen co-doped hollow carbon spheres for sodium-ion batteries with superior cyclic and rate performance
Source: Royal Society of Chemistry journal article supplement (doi:10.1039/c6ta04592h), 2016-01-01
Supplement: c6ta04592h1.pdf [file c6ta04592h1.pdf]

# Electronic Supplementary Material (ESI) for *Journal of Material Chemistry A*

# This journal is (c) The Royal Society of Chemistry 2010

## **Supporting Information**

### **Sulfur and Nitrogen Co-doped Hollow Carbon Spheres for Sodium-ion Batteries with Superior Cyclic and Rate Performance**

**Jianchuan Ye, Jun Zang, Zhaowu Tian, Mingsen Zheng & Quanfeng Dong**

**State Key Laboratory for Physical Chemistry of Solid Surfaces and Department of Chemistry,  
College of Chemistry and Chemical Engineering, Xiamen University, Collaborative  
Innovation Centre of Chemistry for Energy Materials (iChEM), Xiamen 361005, China**

Correspondence should be addressed to Quanfeng Dong (email: [qfdong@xmu.edu.cn](mailto:qfdong@xmu.edu.cn)) or Mingsen  
Zheng (email: [mszheng@xmu.edu.cn](mailto:mszheng@xmu.edu.cn))

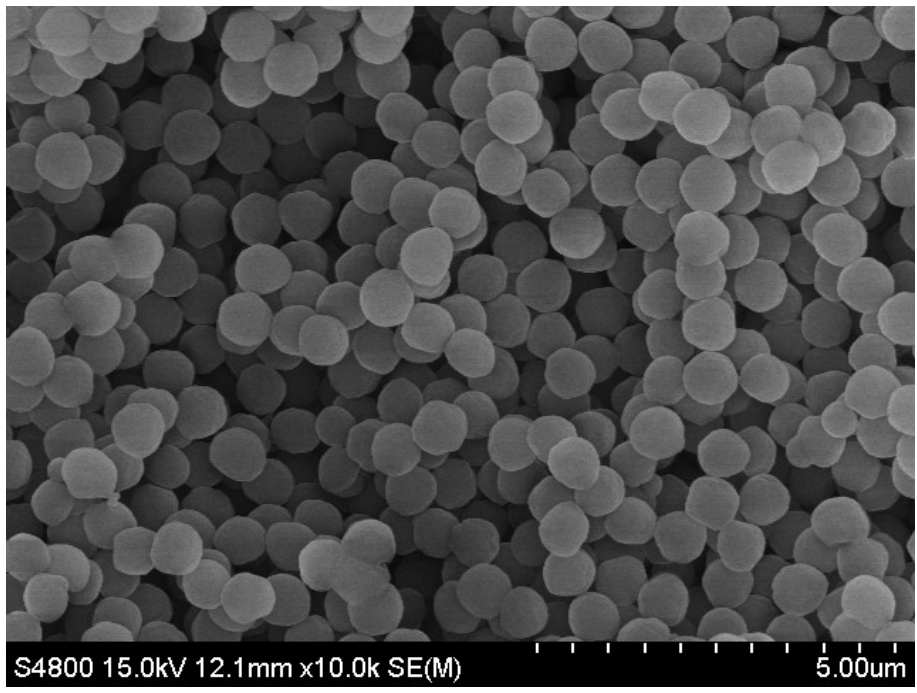

**Fig. S1** SEM image of PMMA template spheres.

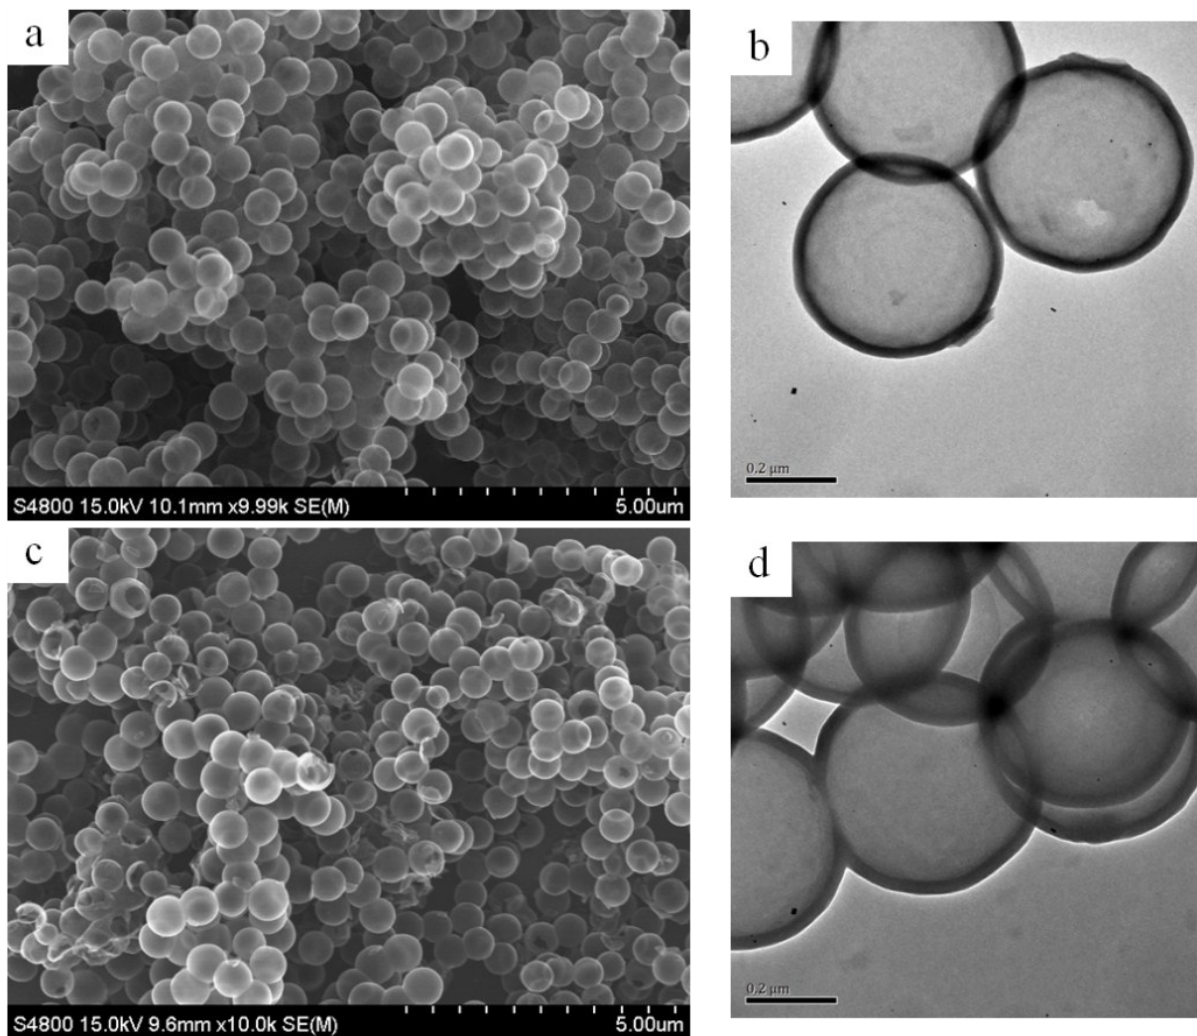

**Fig. S2** (a) SEM image of N-HCS, (b) TEM image of N-HCS, (c) SEM image of HCS, (d) TEM image of HCS.

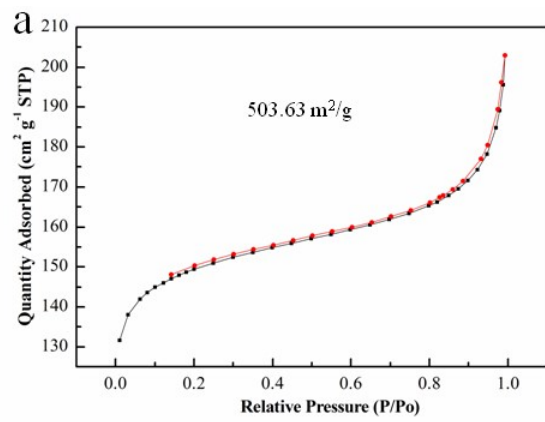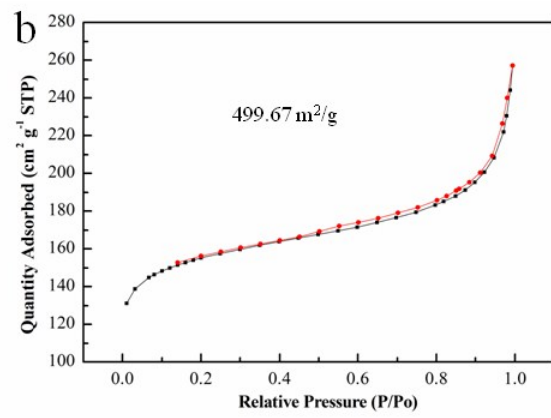

**Fig. S3**  $\text{N}_2$  adsorption-desorption analysis for (a) HCS and (b) N-HCS.

| Species of element | Content (%) |
|--------------------|-------------|
| C                  | 94.43       |
| H                  | 1.016       |
| N                  | 2.408       |
| S                  | 0.552       |

**Tab. S1** Vario El elemental analysis of SN-HCS.

| Species of element | Content (%) |
|--------------------|-------------|
| C                  | 93.89       |
| H                  | 0.998       |
| N                  | 2.375       |

**Tab. S2** Vario El elemental analysis of N-HCS.

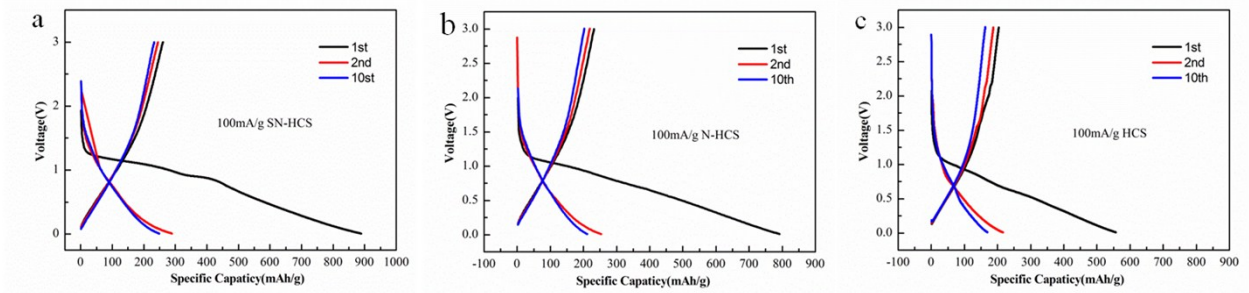

**Fig. S4** (a) 1st, 2nd and 10th Galvanostatic discharge-charge curves of SN-HCS, (b) 1st, 2nd and 10th Galvanostatic discharge-charge curves of N-HCS, (c) 1st, 2nd and 10th Galvanostatic discharge-charge curves of HCS.

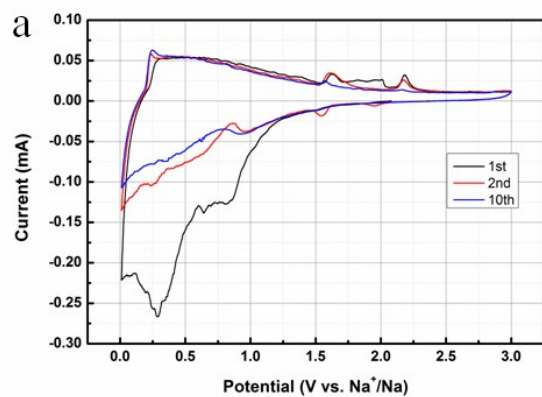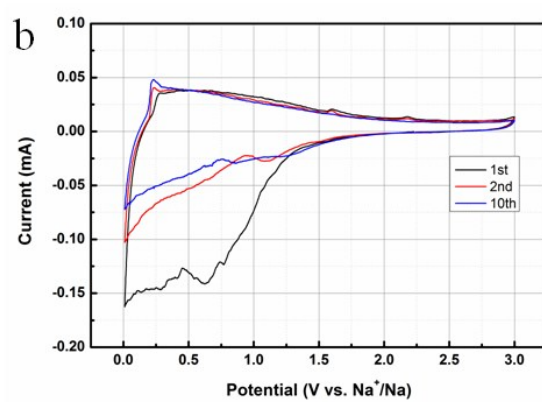

**Fig. S5** Cyclic voltammetry performance of (a) HCS, (b) N-HCS.

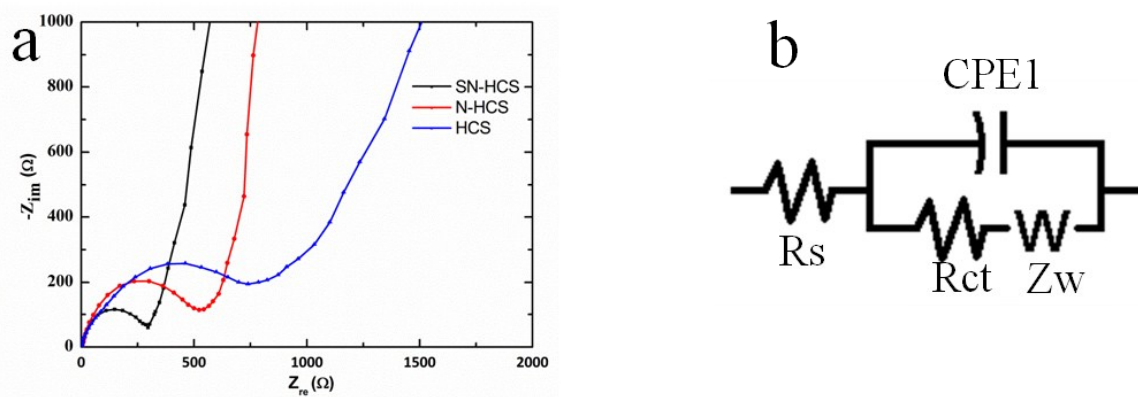

**Fig. S6** (a) Electrochemical impedance spectra for SN-HCS, N-HCS and HCS and (b) equivalent circuit used for fitting the experimental data.

| samples | Rct (Ω) |
|---------|---------|
| SN-HCS  | 162.4   |
| N-HCS   | 311.9   |
| HCS     | 513.5   |

**Tab. S3** The fitting Rct results of SN-HCS, N-HCS and HCS.



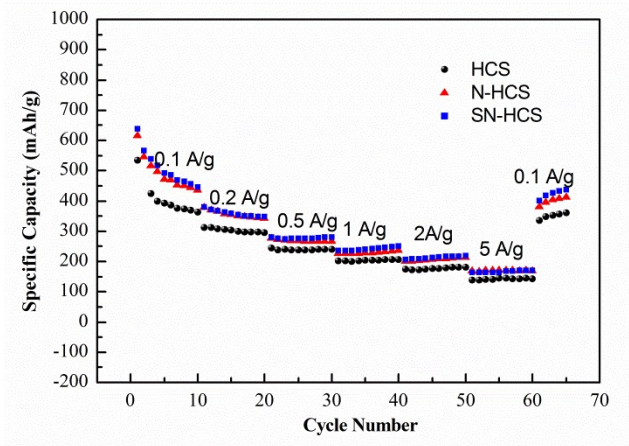

**Fig. S7** Rate performance of LIBs for HCS, N-HCS and SN-HCS.
